# Supplementary material for: Designed synthesis of a proton-conductive Ho-MOF with reversible dehydration and hydration
Source: Royal Society of Chemistry journal article supplement (doi:10.1039/c9dt02269d), 2019-01-01
Supplement: c9dt02269d1.pdf [file c9dt02269d1.pdf]

## Designed synthesis of a proton-conductive Ho-MOF with reversible dehydration and hydration

Sa-Sa Wang,<sup>a</sup> Xiao-Yuan Wu,<sup>a</sup> Zhong Li,<sup>b</sup> and Can-Zhong Lu<sup>\*a</sup>

<sup>a</sup> CAS Key Laboratory of Design and Assembly of Functional Nanostructures, and Fujian Key Laboratory of Nanomaterials, Fujian Institute of Research on the Structure of Matter, Chinese Academy of Sciences, Fuzhou, Fujian, 350002, China.

<sup>b</sup> State Key Laboratory of Photocatalysis on Energy and Environment College of Chemistry, Fuzhou University, Fuzhou, Fujian, 350108, China.

### Experiment methods:

Suitable single crystal of compound **1** was mounted on a loop for the X-ray diffraction. Crystallographic data were collected on an Oxford Diffraction/Agilent SuperNova (dual source) diffractometer equipped with the CrysAlis<sup>pro</sup> X-ray crystallography data systems. The data collection for compound **1** was carried out with graphite-monochromated CuK $\alpha$  radiation ( $\lambda$  = 1.54184 Å) at 100 K. Calculations were performed with SHELXL-2018/1 program package, and the structure was solved by direct method and refined on F<sup>2</sup> by full-matrix least-squares method. Powder X-ray diffraction (PXRD) were carried out on Rigaku desktop MiniFlex 600 diffractometer with CuK $\alpha$  radiation ( $\lambda$  = 1.54184 Å). In situ variable-temperature PXRD were carried out at air atmosphere on Rigaku desktop Ultima-IV diffractometer with CuK $\alpha$  radiation ( $\lambda$  = 1.54184 Å). EDS was determined by using a JSM6700-F microscope. TGA was performed with STA449F3 thermal analysis system. FT-IR spectrum was collected by a VERTEX70 infrared analyzer. Element analysis was measured with a vario MICRO analyzer. Water adsorption isotherm was performed using IGA100B intelligent gravimetric sorption analyser at 298 K with P<sub>0</sub> of 30 mbar. Proton conductivity was measured on Zennium/IM6 impedance analyzer over the frequency ranging from 10<sup>-1</sup> Hz to 10<sup>7</sup> Hz. The relative humidity and temperature were controlled by a STIKCorp CIHI-150BS3 incubator. Operated sample was prepared as a cylindrical pellet of crystalline powder coated with C-pressed electrodes. The bulk conductivity was estimated by semicircle fittings of Nyquist plots.

### Synthesis of compound 1:

0.189 g (0.5 mmol) Ho<sub>2</sub>O<sub>3</sub> and 0.536 g NaH<sub>2</sub>SIP were stocked into a PTFE-lined autoclave, and then 15 ml deionized water was added. After ultrasonic treated for 15 min, the mixture was sealed and heated in an oven at 170 °C for 7 days. After cooling with a programmed procedure for 1 day, crystalline solids were collected by filtration (Yield 90% based on Ho<sub>2</sub>O<sub>3</sub>). FT-IR (KBr / cm<sup>-1</sup>): 3387 (br), 1611 (m), 1534 (s), 1453 (s), 1390 (s), 1214 (m), 1173 (m), 1119 (w), 1038 (s), 635 (s). Anal. Calcd (%) for **1**: C 17.40, H 3.47. Found: C 17.28, H 3.42.

### Crystal data of 1:

C<sub>8</sub>H<sub>19</sub>O<sub>15</sub>SHo; Mr = 552.22, monoclinic, P2<sub>1</sub>/n, a = 9.4135(3) Å, b = 10.5485(3) Å, c = 17.0809(4) Å,  $\beta$  = 101.273(3), V = 1663.39(8) Å<sup>3</sup>, Z = 4,  $\rho$  = 2.189 g cm<sup>-3</sup>,  $\mu$  = 10.812 mm<sup>-1</sup>, F(000) = 1080.0, GOF = 1.048. A total of 6023 reflections were collected in the range of 9.91° ≤ 2 $\theta$  ≤ 133.19°, 2935 of which were unique (R<sub>int</sub> = 0.0288). Final R indexes for I ≥ 2 $\sigma$ (I) were R<sub>1</sub> = 0.0288 and wR<sub>2</sub> = 0.0756, and that for all data were R<sub>1</sub> = 0.0324 and wR<sub>2</sub> = 0.0782. CCDC-1886086.

### Additional figures and tables:

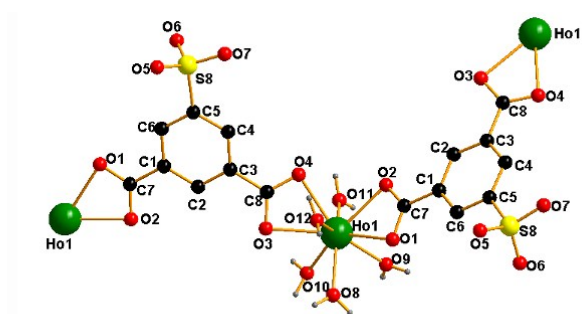

**Figure S1** Representative coordination models of the  $\text{Ho}^{3+}$  ions and SIP ligands in the crystal structure of compound **1**.

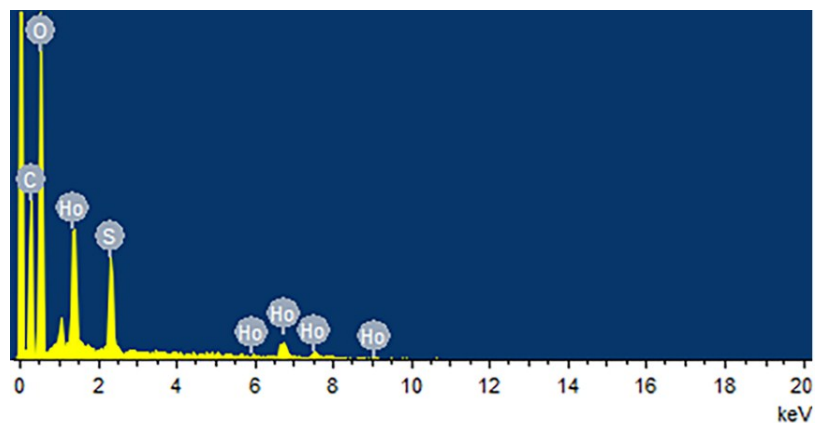

**Figure S2** EDS result of compound **1**.

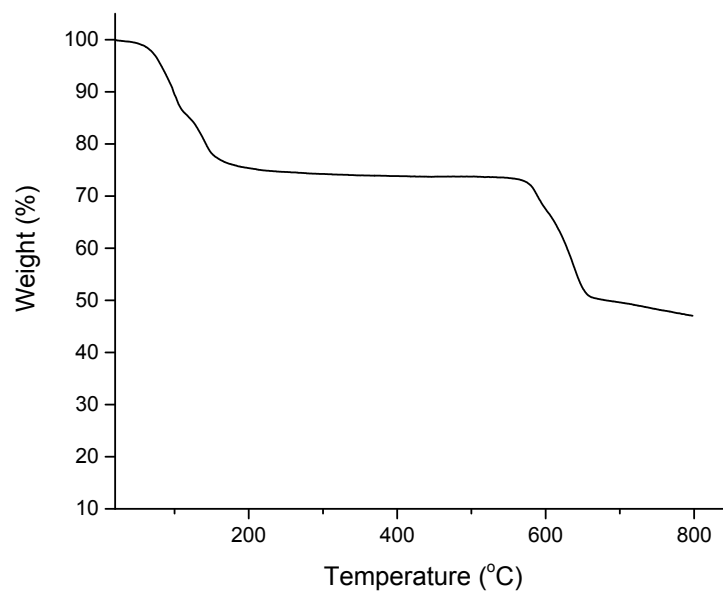

**Figure S3** TG curve of compound **1** collected under  $\text{N}_2$  atmosphere.

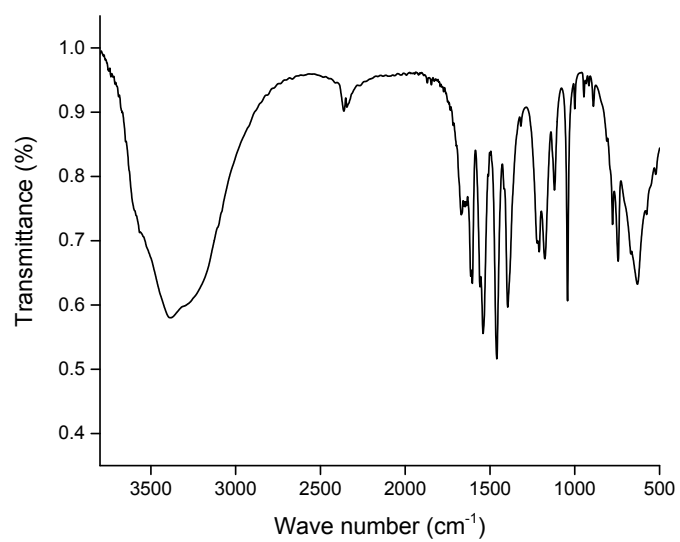

**Figure S4** FT-IR spectrum of compound **1**.

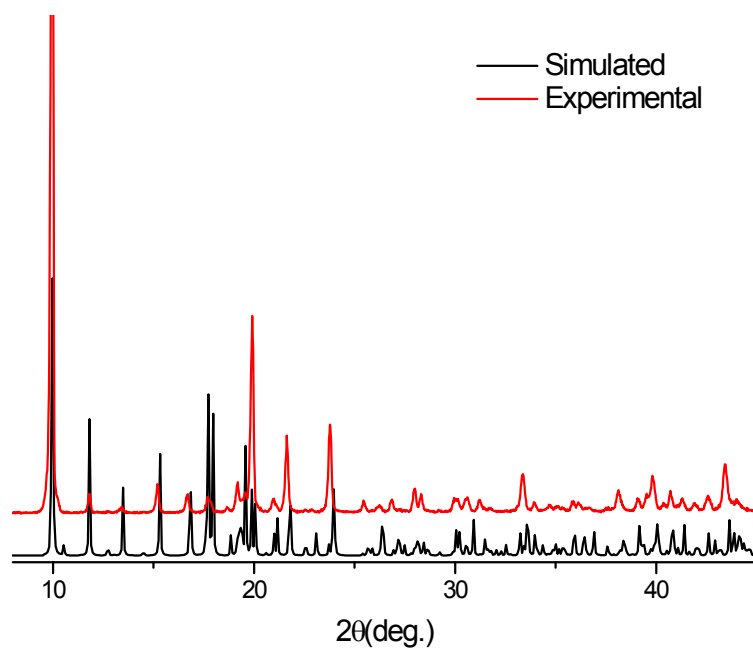

**Figure S5** Simulated and experimental PXRD patterns of compound **1**.

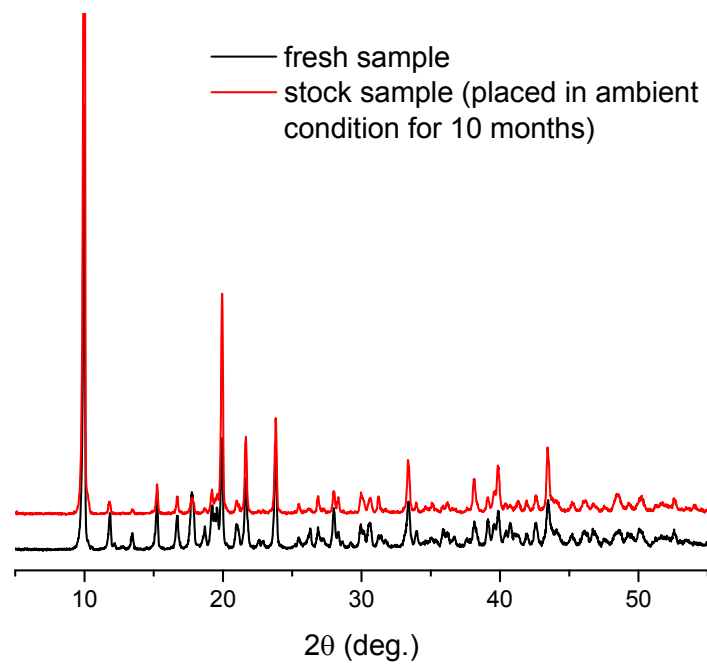

Figure S6 PXRD patterns of fresh and stock sample of 1.

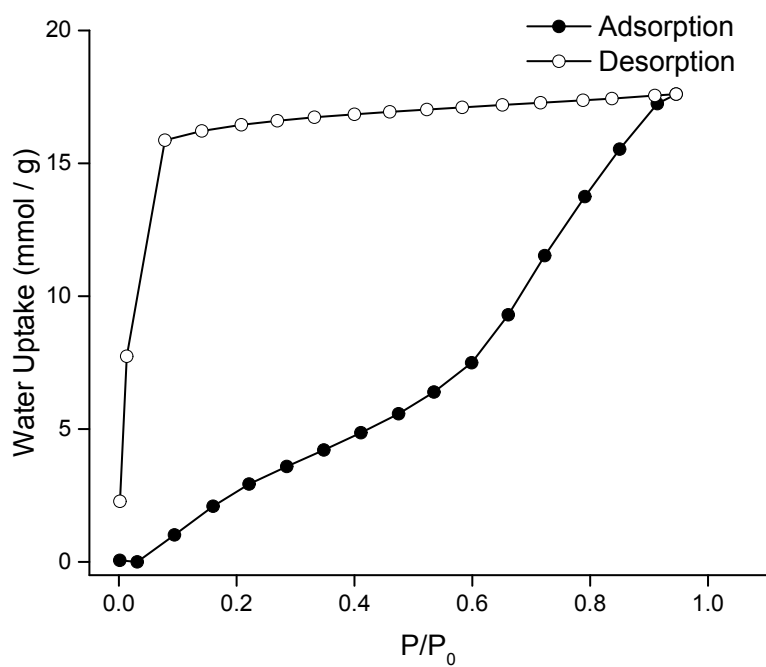

Figure S7 Water vapor adsorption isotherm of compound 1 at 298 K. ( $P/P_0$  : relative pressure of water.)

**Table S1** Hydrogen bonds for compound **1**.

| D-H...A                           | d(D-H) / Å | d(H...A) / Å | d(D...A) / Å | <(DHA) / ° |
|-----------------------------------|------------|--------------|--------------|------------|
| O(8)-H(8A)...O(2) <sup>a</sup>    | 0.85       | 1.956        | 2.804        | 174.30     |
| O(8)-H(8B)...O(6) <sup>b</sup>    | 0.85       | 1.834        | 2.681        | 174.21     |
| O(9)-H(9A)...O(4) <sup>a</sup>    | 0.85       | 1.892        | 2.742        | 179.13     |
| O(9)-H(9B)...O(13) <sup>c</sup>   | 0.85       | 1.887        | 2.737        | 178.90     |
| O(10)-H(10A)...O(6) <sup>d</sup>  | 0.85       | 2.094        | 2.920        | 163.90     |
| O(10)-H(10B)...O(3) <sup>c</sup>  | 0.85       | 2.064        | 2.890        | 163.77     |
| O(11)-H(11A)...O(1) <sup>d</sup>  | 0.85       | 1.870        | 2.720        | 178.63     |
| O(11)-H(11B)...O(14)              | 0.85       | 1.859        | 2.709        | 178.59     |
| O(12)-H(12A)...O(5) <sup>e</sup>  | 0.85       | 1.965        | 2.809        | 171.89     |
| O(12)-H(12B)...O(15)              | 0.85       | 1.919        | 2.763        | 171.95     |
| O(13)-H(13A)...O(5) <sup>f</sup>  | 0.85       | 2.228        | 2.966        | 145.31     |
| O(13)-H(13B)...O(15) <sup>f</sup> | 0.85       | 2.072        | 2.809        | 144.70     |
| O(15)-H(15A)...O(7) <sup>b</sup>  | 0.85       | 1.922        | 2.766        | 171.49     |
| O(15)-H(15B)...O(3) <sup>f</sup>  | 0.85       | 2.452        | 3.296        | 172.06     |

Symmetry transformation used to generate equivalent atoms: a:  $[-x+3/2, y+1/2, -z+1/2]$ ; b:  $[x+1/2, -y+3/2, z+1/2]$ ; c:  $[-x+2, -y+1, -z+1]$ ; d:  $[-x+3/2, y-1/2, -z+1/2]$ ; e:  $[-x+1/2, y-1/2, -z+1/2]$ ; f:  $[-x+1, -y+1, -z+1]$

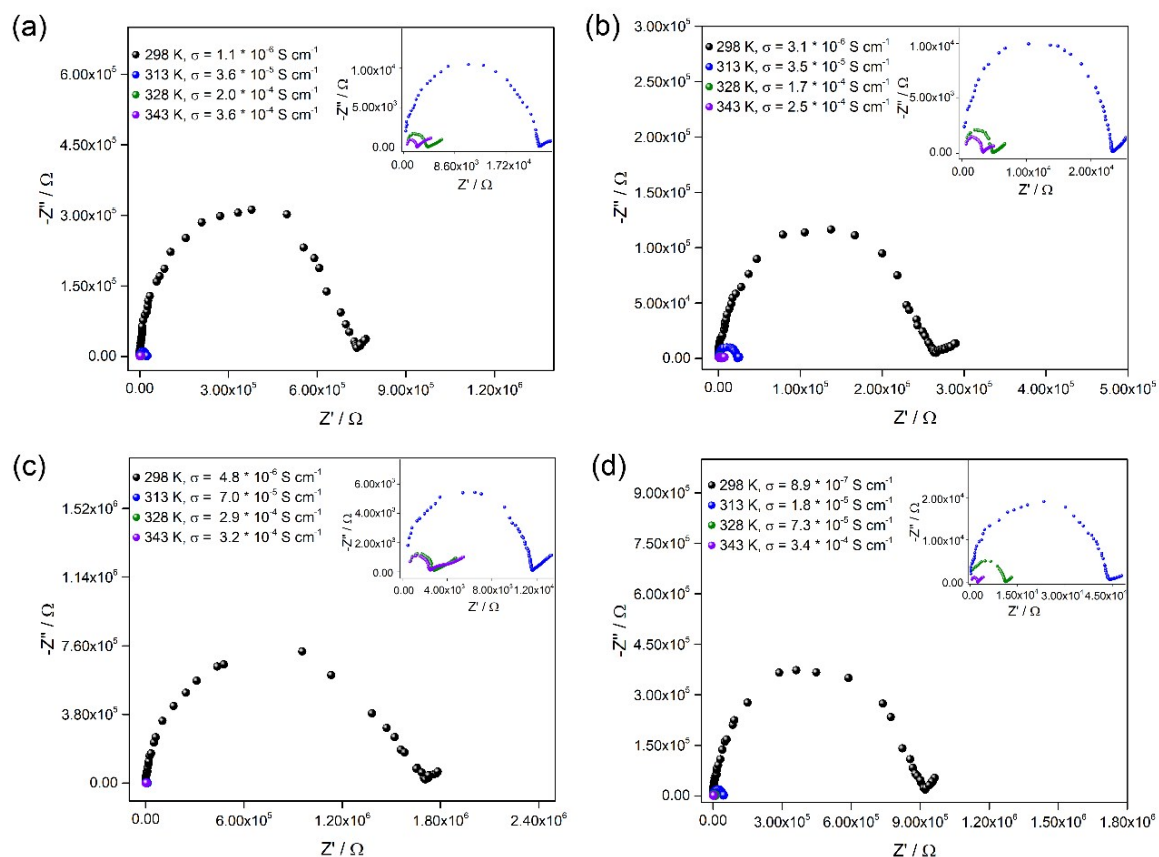**Figure S8** Proton conductivity of as-prepared **1** under different pH. (a) pH = 2; (b) pH = 4; (c) pH = 6; (d) pH = 8.

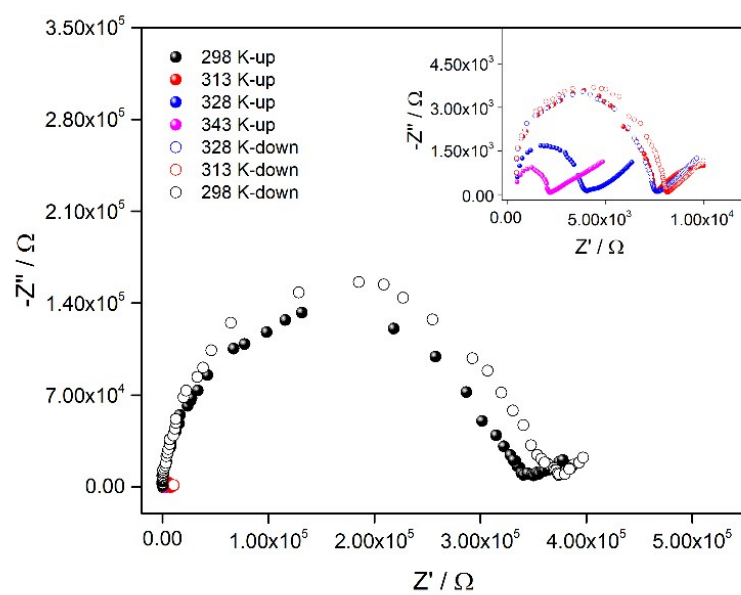

**Figure S9** Proton conductivity of compound **1** as increasing temperature from 298 K to 343 K and decreasing temperature from 343 K to 298 K (up: increasing temperature process; down: decreasing temperature process).
